# Supplementary material
Source: Springer Nature journal article supplement (https://www.springermedizin.de/resource/supplementary/13031_2014_144_MOESM2_ESM.pdf/9645204)
Supplement: MOESM2 [file 9645204]

## Phase I: Instrument Formulation

Literature Review

Legal Conceptual Framework  
(Expert consultation)

Qualitative study  
(In-depth interviews n=27)

Development of Draft Instrument  
(33 items)

Review key informants on the Thai/Burma border to  
further refine the instrument prior to validation

## Phase II: Instrument Validation

Face and content validity (Health workers (n =38))

Inter-rater reliability (Health workers (n=38))
